# Supplementary material for: CCR7-mediated T follicular helper cell differentiation is associated with the pathogenesis and immune microenvironment of spinal cord injury-induced immune deficiency syndrome
Source: Front Neurosci. 2022 Oct 14;16:1019406. doi: 10.3389/fnins.2022.1019406 (PMC9615471; doi:10.3389/fnins.2022.1019406)
Supplement: Supplementary file 1 [file Table_1.XLSX]

## Sheet: Sheet1
Cluster1	Cluster2	Cluster3	Cluster4	Cluster5	Cluster6	Cluster7	Cluster8	Cluster9	Cluster10	Cluster11	Cluster12	Cluster13	Cluster14	Cluster15
KLRB1	DTL	CXCR5	KLRD1	MCOLN2	GP9	TIMP1	ITPKC	RPL3	PPP2R3B	DGAT2	AGFG1	DPP4	SDC4	CEBPB
SLAMF1	DLGAP5	THBS1	CD247	ANK3	ITGA2B	ITGB3	PLCG1	MDN1	PPP1R3D	AGPAT9	TBC1D4	CEACAM1	ADAMTS10	TXN
NCR1	POLE2	GNG11	GZMB	CD55	LY6G6F	SPHK1	PLCH1	RPL23	PPP2R2B	MGLL	EXOC6	CEACAM6	SMTNL1	EPB42
TIGIT	DEPDC1B	STAT4	SH2D1A	CD59	TREML1	PTGS2							NCKAP1	HSPA1B
CCR7	CCNB1	MYLK	LY9	CD63									LTBP1	HSPA2
SLAMF6	CDKN3	P2RY12	ITGA1										PDLIM1	GATA1
CD160	SKA3	ITGB5											FBN2	TUBB1
KLRC2	KIF15	KLRG1												CA1
GZMH	NCAPG	CX3CR1												SELENBP1
CD5		MYL9												SMAD3
CD2		GNA15
GZMK		COL4A3
CD8A		CALD1
		COL24A1
		S1PR4
		GNG5
		PLOD2
		MAF
		GNAZ
		COL19A1
		COLGALT2
		PF4
