# Supplementary material for: CCR7-mediated T follicular helper cell differentiation is associated with the pathogenesis and immune microenvironment of spinal cord injury-induced immune deficiency syndrome
Source: Front Neurosci. 2022 Oct 14;16:1019406. doi: 10.3389/fnins.2022.1019406 (PMC9615471; doi:10.3389/fnins.2022.1019406)
Supplement: Supplementary file 2 [file Data_Sheet_2.xlsx]

## Sheet: Data Sheet 1
ID	pvalue
MIR6723	0.035
LOC100288069	0.014
FAM41C	0.01
ISG15	0.028
TNFRSF18	0.037
TNFRSF4	0.013
UBE2J2	0.028
ATAD3C	0.022
CDK11B	0.016
CDK11A	0.021
DFFB	0.027
LINC01134	0.049
CHD5	0.032
RPL22	0.009
ACOT7	0.014
HES2	0.047
TNFRSF25	0.028
CAMTA1	0.018
TNFRSF9	0.022
H6PD	0.033
LOC100506022	0.009
PIK3CD_AS1	0.023
LZIC	0.014
NMNAT1	0.007
KIF1B	0.005
PGD	0.005
FBXO2	0.022
FBXO44	0.02
NPPA	0.01
RNU5E_1	0.038
DHRS3	0.012
PDPN	0.03
KAZN	0.025
FHAD1	0.019
CELA2B	0.031
AGMAT	0.046
SLC25A34	0.019
FBLIM1	0.022
FBXO42	0.011
FAM231B	0.047
PADI4	0.025
PADI6	0.034
ARHGEF10L	0.036
LOC100506730	0.014
AKR7A2	0.032
PQLC2	0.017
TMCO4	0.037
OTUD3	0.034
LINC01141	0.034
CDA	0.034
PINK1_AS	0.049
HP1BP3	0.023
EIF4G3	0.019
ALPL	0.04
HSPG2	0.041
KDM1A	0.013
ZNF436_AS1	0.026
TCEA3	0.005
E2F2	0.01
LOC101928163	0.021
ID3	0.009
RPL11	0.016
MYOM3	0.014
LOC284632	0.011
RCAN3	0.005
NCMAP	0.033
RHD	0.022
LDLRAP1	0.029
PDIK1L	0.017
ZNF593	0.039
LOC101928303	0.015
CD52	0.014
ZNF683	0.011
LIN28A	0.008
PIGV	0.037
ACTG1P20	0.023
FGR	0.004
STX12	0.039
SCARNA1	0.029
THEMIS2	0.007
SNORA73A	0.021
SNORA73B	0.019
SNHG12	0.011
SNORD99	0.017
SNORA61	0.022
SNORA44	0.02
SNORA16A	0.023
RAB42	0.009
RNU11	0.01
EPB41	0.021
SRSF4	0.04
MECR	0.011
SNORD85	0.039
SNRNP40	0.02
SERINC2	0.015
LINC01226	0.009
TINAGL1	0.015
PTP4A2	0.038
TMEM234	0.025
LCK	0.004
MARCKSL1	0.032
TSSK3	0.013
ZBTB8A	0.039
ZBTB8OS	0.026
S100PBP	0.013
A3GALT2	0.04
SMIM12	0.019
ZMYM1	0.038
ZMYM4	0.008
C1orf216	0.046
CLSPN	0.015
AGO4	0.005
ADPRHL2	0.047
SNIP1	0.016
EPHA10	0.01
C1orf122	0.048
MTF1	0.005
FHL3	0.048
RHBDL2	0.007
AKIRIN1	0.018
NDUFS5	0.028
KIAA0754	0.015
PPIEL	0.009
LOC101929516	0.016
SNORA55	0.047
PPIE	0.03
MYCL	0.042
PPT1	0.044
RIMS3	0.026
NFYC	0.034
SLFNL1_AS1	0.01
SCMH1	0.016
RIMKLA	0.025
C1orf50	0.032
ERMAP	0.007
C1orf210	0.002
ST3GAL3	0.02
ERI3	0.005
RNU5F_1	0.018
RNU5D_1	0.042
RPS8	0.014
SNORD46	0.035
PTCH2	0.007
ZSWIM5	0.007
MUTYH	0.026
CCDC163P	0.022
CCDC17	0.005
PIK3R3	0.006
POMGNT1	0.008
LURAP1	0.027
UQCRH	0.013
FAAHP1	0.029
DMBX1	0.011
MKNK1_AS1	0.01
MKNK1	0.005
PDZK1IP1	0.035
CMPK1	0.022
TTC39A	0.011
OSBPL9	0.008
NRD1	0.023
ZYG11B	0.021
ZYG11A	0.014
CPT2	0.035
LRP8	0.046
NDC1	0.009
YIPF1	0.017
LRRC42	0.03
MROH7_TTC4	0.019
C1orf177	0.014
OMA1	0.014
HOOK1	0.037
L1TD1	0.026
KANK4	0.005
USP1	0.047
LINC00466	0.033
PGM1	0.007
ROR1_AS1	0.03
AK4	0.035
DNAJC6	0.013
LEPROT	0.026
LEPR	0.047
WDR78	0.007
C1orf141	0.023
GADD45A	0.006
LRRC40	0.03
ANKRD13C	0.008
HHLA3	0.005
LINC01360	0.042
CRYZ	0.046
ACADM	0.047
ST6GALNAC3	0.007
ZZZ3	0.028
USP33	0.033
NEXN_AS1	0.01
PTGFR	0.011
LOC101927587	0.022
PRKACB	0.004
GNG5	0.026
SPATA1	0.027
SSX2IP	0.042
LPAR3	0.009
WDR63	0.025
BCL10	0.017
PKN2	0.017
GBP3	0.033
GBP1	0.019
GBP4	0.008
GBP5	0.005
GBP1P1	0.005
ZNF644	0.007
HFM1	0.012
TGFBR3	0.017
BRDT	0.005
GLMN	0.028
RPAP2	0.005
RPL5	0.011
FAM69A	0.029
SNORD21	0.046
CCDC18	0.028
ARHGAP29	0.017
F3	0.02
LINC01057	0.004
TMEM56	0.044
LOC101928118	0.01
FLJ31662	0.011
DPYD_AS2	0.011
LOC729987	0.01
CDC14A	0.019
LOC102606465	0.031
LOC101928370	0.022
LOC100129138	0.04
PRMT6	0.039
SLC25A24	0.022
CLCC1	0.031
TAF13	0.019
SCARNA2	0.017
SORT1	0.005
PSMA5	0.01
AMIGO1	0.028
MIR197	0.021
GNAT2	0.01
GSTM1	0.016
KCNC4	0.047
LOC440600	0.016
SLC16A4	0.005
LAMTOR5	0.02
KCNA2	0.036
KCNA3	0.02
CD53	0.037
C1orf162	0.04
TMIGD3	0.038
LINC01160	0.008
KCND3	0.032
RHOC	0.018
LINC01356	0.019
SLC16A1_AS1	0.036
LOC100996251	0.023
MAGI3	0.02
PHTF1	0.004
RSBN1	0.021
PTPN22	0.03
BCL2L15	0.003
AP4B1	0.013
HIPK1_AS1	0.035
HIPK1	0.007
LOC101928977	0.005
SLC22A15	0.004
CD2	0.007
CD101	0.03
MAN1A2	0.013
WARS2	0.046
WARS2_IT1	0.012
ZNF697	0.015
PHGDH	0.025
RNVU1_19	0.02
FCGR1B	0.013
NBPF15	0.042
RNVU1_14	0.025
NBPF20	0.015
NBPF25P	0.022
CD160	0.01
POLR3C	0.009
GNRHR2	0.026
NBPF10	0.045
CHD1L	0.043
ACP6	0.013
RNVU1_7	0.026
NBPF11	0.007
MIR5087	0.014
RNU1_13P	0.045
LINC01138	0.019
NBPF14	0.012
HIST2H2BF	0.011
FCGR1A	0.015
HIST2H3D	0.028
HIST2H2BE	0.023
HIST2H2AC	0.02
HIST2H2AB	0.022
BOLA1	0.034
PLEKHO1	0.043
FALEC	0.02
MCL1	0.024
ENSA	0.014
CTSK	0.005
ARNT	0.003
ANXA9	0.01
PRUNE	0.022
SCNM1	0.036
PIP5K1A	0.005
RFX5	0.032
CELF3	0.026
LOC100131107	0.009
S100A9	0.003
S100A12	0.025
S100A8	0.008
RAB13	0.008
RPS27	0.002
HAX1	0.015
ATP8B2	0.025
EFNA1	0.019
DPM3	0.038
MUC1	0.042
THBS3	0.008
MTX1	0.031
GBA	0.047
POU5F1P4	0.027
YY1AP1	0.027
DAP3	0.013
GON4L	0.019
SEMA4A	0.033
SLC25A44	0.046
CCT3	0.032
RHBG	0.048
APOA1BP	0.017
MRPL24	0.01
ETV3	0.035
FCRL3	0.016
FCRL1	0.028
CD1E	0.014
PYHIN1	0.017
FCER1A	0.008
DUSP23	0.044
FCRL6	0.041
LINC01133	0.011
IGSF8	0.029
ATP1A2	0.028
COPA	0.043
SLAMF6	0.017
SLAMF1	0.011
CD48	0.03
LY9	0.018
CD244	0.011
LOC101928372	0.037
ARHGAP30	0.042
NIT1	0.007
DEDD	0.015
ADAMTS4	0.009
FCER1G	0.019
APOA2	0.016
TOMM40L	0.012
NR1I3	0.02
PCP4L1	0.03
FCRLB	0.019
NOS1AP	0.009
HSD17B7	0.027
PBX1	0.033
LOC100147773	0.022
GPA33	0.014
CD247	0.003
TBX19	0.022
LOC101928565	0.008
XCL1	0.021
LINC00970	0.01
NME7	0.016
F5	0.01
SELL	0.021
METTL18	0.006
KIFAP3	0.017
FMO4	0.018
DNM3	0.02
SUCO	0.012
FASLG	0.039
LOC100506023	0.007
LOC101928673	0.009
ANKRD45	0.013
GAS5_AS1	0.021
GAS5	0.004
SNORD81	0.016
SNORD47	0.009
SNORD80	0.032
SNORD79	0.008
SNORD78	0.003
SNORD44	0.006
SNORD77	0.007
SNORD76	0.009
SNORD75	0.004
SNORD74	0.006
ZBTB37	0.009
RC3H1	0.031
RABGAP1L	0.017
GPR52	0.017
KIAA0040	0.049
RASAL2_AS1	0.016
C1orf220	0.008
ANGPTL1	0.044
ABL2	0.031
TOR1AIP2	0.017
QSOX1	0.02
FLJ23867	0.012
LHX4_AS1	0.035
XPR1	0.049
KIAA1614	0.008
IER5	0.012
CACNA1E	0.025
RNASEL	0.016
LAMC1	0.003
LAMC2	0.021
NMNAT2	0.006
APOBEC4	0.023
FAM129A	0.015
IVNS1ABP	0.016
HMCN1	0.023
PACERR	0.048
LOC440704	0.016
RGS18	0.014
CFH	0.022
ZBTB41	0.016
DENND1B	0.029
ZNF281	0.011
LOC101929224	0.012
C1orf106	0.012
RPS10P7	0.008
GPR37L1	0.008
ARL8A	0.005
UBE2T	0.036
KDM5B	0.028
MGAT4EP	0.012
RABIF	0.003
KLHL12	0.014
PRELP	0.003
LINC00260	0.013
LAX1	0.031
ZBED6	0.025
SNRPE	0.014
SOX13	0.019
DSTYK	0.006
LEMD1_AS1	0.018
SLC41A1	0.043
LOC284581	0.011
MAPKAPK2	0.013
IL24	0.014
FCMR	0.045
PFKFB2	0.006
CD55	0.004
CR1	0.003
LAMB3	0.006
G0S2	0.023
NEK2	0.029
LPGAT1	0.045
RPL21P28	0.02
SNORA16B	0.017
NENF	0.036
PTPN14	0.033
LOC101929631	0.019
LYPLAL1	0.015
EPRS	0.033
AURKAPS1	0.043
2022-03-01	0.031
LINC01352	0.004
C1orf140	0.028
AIDA	0.046
TLR5	0.029
TP53BP2	0.007
GTF2IP20	0.016
DEGS1	0.015
WDR26	0.026
MIR4742	0.031
LBR	0.015
LEFTY1	0.039
MIXL1	0.005
LIN9	0.04
ITPKB_IT1	0.049
ADCK3	0.04
ZNF678	0.01
LOC100130093	0.043
MRPL55	0.018
HIST3H2A	0.021
HIST3H2BB	0.028
RHOU	0.022
NUP133	0.041
GALNT2	0.012
C1orf198	0.019
ARV1	0.048
FAM89A	0.035
EXOC8	0.028
TSNAX	0.021
DISC1	0.007
DISC2	0.008
DISC1_IT1	0.021
SIPA1L2	0.003
PCNXL2	0.016
LOC101927851	0.015
SNORA14B	0.033
RBM34	0.012
GNG4	0.01
EDARADD	0.013
HEATR1	0.031
MTR	0.022
LINC01347	0.013
AKT3	0.006
LOC101928068	0.015
KIF26B	0.033
SMYD3	0.016
ZNF669	0.022
C1orf229	0.012
ZNF124	0.008
MIR3916	0.036
GCSAML	0.047
SH3BP5L	0.042
ZNF692	0.008
IDI1	0.019
WDR37	0.033
LINC00700	0.014
PITRM1_AS1	0.033
LOC101927964	0.009
LINC00703	0.028
AKR1E2	0.043
AKR1C2	0.017
AKR1C3	0.024
FAM208B	0.047
GDI2	0.017
ANKRD16	0.004
PFKFB3	0.012
LOC399715	0.01
PRKCQ	0.036
SFMBT2	0.007
ITIH5	0.012
KIN	0.029
ATP5C1	0.005
CELF2_AS1	0.03
ECHDC3	0.015
PROSER2_AS1	0.009
SEC61A2	0.026
OPTN	0.017
BEND7	0.013
FRMD4A	0.013
OLAH	0.006
ACBD7	0.011
FAM171A1	0.014
FAM188A	0.035
PTER	0.014
C1QL3	0.031
RSU1	0.012
VIM	0.025
ST8SIA6	0.014
STAM_AS1	0.029
TMEM236	0.008
NSUN6	0.039
LOC101928834	0.029
LOC100499489	0.034
ARMC3	0.008
MSRB2	0.04
OTUD1	0.045
PRTFDC1	0.036
ENKUR	0.033
LINC00202_2	0.006
PDSS1	0.01
LINC00202_1	0.014
ANKRD26	0.022
MASTL	0.028
LRRC37A6P	0.025
ARMC4	0.028
MPP7	0.017
C10orf126	0.049
SVIL_AS1	0.006
SVIL	0.005
MIR604	0.027
MIR938	0.046
KIAA1462	0.013
SVILP1	0.018
ZNF438	0.008
ARHGAP12	0.02
LOC101929431	0.018
CCDC7	0.011
ITGB1	0.017
CUL2	0.022
LINC00999	0.011
RET	0.046
CSGALNACT2	0.006
RASGEF1A	0.019
ZNF239	0.015
ZNF32	0.009
TMEM72_AS1	0.023
ZNF22	0.019
ALOX5	0.003
LOC102724323	0.015
FAM21C	0.043
NCOA4	0.012
ANTXRLP1	0.027
CTSLP2	0.022
MAPK8	0.021
LRRC18	0.01
VSTM4	0.006
FAM170B_AS1	0.044
PARG	0.023
PRKG1	0.02
MTRNR2L5	0.005
BICC1	0.02
RTKN2	0.041
EGR2	0.04
JMJD1C	0.04
JMJD1C_AS1	0.031
POU5F1P5	0.008
RUFY2	0.029
TET1	0.004
CCAR1	0.027
DDX50	0.02
LOC101928994	0.02
HK1	0.048
TSPAN15	0.018
TYSND1	0.038
PPA1	0.022
PRF1	0.005
SPOCK2	0.005
ASCC1	0.039
MSS51	0.006
SYNPO2L	0.011
ZSWIM8_AS1	0.036
DUSP13	0.016
SAMD8	0.012
C10orf11	0.017
KCNMA1_AS3	0.021
RPS24	0.003
NUTM2B_AS1	0.044
NUTM2B	0.031
ANXA11	0.033
DYDC2	0.028
CCSER2	0.008
LDB3	0.041
MMRN2	0.017
FAM35A	0.037
LINC00864	0.014
ATAD1	0.037
CFL1P1	0.016
LIPM	0.024
ANKRD22	0.007
STAMBPL1	0.015
IFIT2	0.015
IFIT3	0.041
IFIT1	0.022
IFIT5	0.022
PANK1	0.008
KIF20B	0.01
ANKRD1	0.033
XLOC_008559	0.016
PCGF5	0.005
FGFBP3	0.026
CPEB3	0.02
2022-03-05	0.009
FFAR4	0.007
PIPSL	0.03
NOC3L	0.027
ALDH18A1	0.042
TCTN3	0.037
ENTPD1	0.004
ENTPD1_AS1	0.005
CC2D2B	0.006
TLL2	0.023
PIK3AP1	0.005
C10orf12	0.012
SLIT1	0.019
ARHGAP19	0.004
EXOSC1	0.012
UBTD1	0.032
ANKRD2	0.045
GOLGA7B	0.047
R3HCC1L	0.038
LOXL4	0.01
CNNM1	0.018
SLC25A28	0.009
ENTPD7	0.005
COX15	0.021
CUTC	0.035
ABCC2	0.039
DNMBP_AS1	0.006
ERLIN1	0.018
SNORA12	0.013
OLMALINC	0.036
LOC101927419	0.008
FBXW4	0.034
TMEM180	0.009
ACTR1A	0.012
WBP1L	0.049
CNNM2	0.031
NT5C2	0.02
COL17A1	0.009
RPL13AP6	0.022
VTI1A	0.006
LOC103344931	0.011
TCF7L2	0.049
TDRD1	0.028
ABLIM1	0.043
LOC101927692	0.007
FAM160B1	0.01
TRUB1	0.018
ENO4	0.04
PDZD8	0.011
EMX2OS	0.022
CACUL1	0.026
RGS10	0.023
RPL21	0.005
DMBT1P1	0.01
C10orf88	0.033
BUB3	0.015
CHST15	0.015
OAT	0.043
FAM53B	0.041
FAM53B_AS1	0.035
CTBP2	0.006
MIR4296	0.021
UROS	0.018
PTPRE	0.021
MGMT	0.039
GLRX3	0.013
PPP2R2D	0.006
BNIP3	0.027
STK32C	0.042
LRRC27	0.016
INPP5A	0.037
VENTX	0.01
PRAP1	0.049
FUOM	0.031
ECHS1	0.048
PAOX	0.032
SIGIRR	0.046
RASSF7	0.043
MIR210HG	0.016
LOC143666	0.032
EPS8L2	0.036
RPLP2	0.004
SNORA52	0.031
AP2A2	0.038
MIR4298	0.014
SLC22A18AS	0.042
SLC22A18	0.023
NAP1L4	0.03
SNORA54	0.01
CARS	0.008
ART1	0.028
CHRNA10	0.022
PGAP2	0.047
RHOG	0.028
RRM1	0.048
OR51E2	0.005
TRIM34	0.027
OR52W1	0.034
FAM160A2	0.007
CNGA4	0.006
APBB1	0.028
MRPL17	0.003
GVINP1	0.009
LOC100506258	0.011
OLFML1	0.002
LOC283299	0.014
EIF3F	0.033
TRIM66	0.041
RPL27A	0.013
SNORA45A	0.026
TMEM9B_AS1	0.022
NRIP3	0.014
DENND5A	0.044
TMEM41B	0.029
IPO7	0.026
SNORA23	0.014
SBF2_AS1	0.021
SBF2	0.005
LOC101928008	0.004
CAND1_11	0.022
AMPD3	0.043
MTRNR2L8	0.015
RNF141	0.019
LYVE1	0.015
MRVI1	0.036
SNORD97	0.012
LINC00958	0.01
ARNTL	0.012
INSC	0.026
SOX6	0.019
PLEKHA7	0.045
RPS13	0.004
SERGEF	0.005
MRGPRX3	0.014
LOC494141	0.027
GTF2H1	0.039
LDHA	0.011
LDHAL6A	0.047
UEVLD	0.033
HTATIP2	0.014
PRMT3	0.016
LUZP2	0.021
BBOX1_AS1	0.021
LINC00678	0.026
ARL14EP	0.008
DCDC5	0.011
IMMP1L	0.017
PAX6	0.042
DKFZp686K1684	0.033
LOC100506675	0.027
WT1_AS	0.011
EIF3M	0.01
CCDC73	0.024
CSTF3_AS1	0.018
CD59	0.004
CAPRIN1	0.018
SLC1A2	0.018
PRR5L	0.006
CD82	0.009
LOC221122	0.005
PHF21A	0.005
CHRM4	0.022
CKAP5	0.016
SNORD67	0.031
NR1H3	0.027
MYBPC3	0.004
RAPSN	0.015
PTPRJ	0.011
MIR3161	0.009
TRIM51	0.011
OR7E5P	0.045
SLC43A1	0.037
TIMM10	0.013
UBE2L6	0.02
C11orf31	0.01
GLYATL2	0.015
LOC283194	0.041
LOC101927204	0.014
OR10V2P	0.04
STX3	0.004
MRPL16	0.03
MS4A4A	0.016
MS4A10	0.011
PTGDR2	0.022
TMEM109	0.024
CD6	0.009
CD5	0.032
CYB561A3	0.027
TMEM138	0.012
RPLP0P2	0.023
MYRF	0.032
TMEM258	0.01
EEF1G	0.01
METTL12	0.009
SNORA57	0.026
TMEM223	0.003
WDR74	0.016
RNU2_2P	0.017
SNHG1	0.009
SNORD22	0.025
SNORD31	0.005
SNORD30	0.009
SNORD29	0.009
SNORD28	0.006
SNORD27	0.019
SNORD26	0.008
SNORD25	0.008
RARRES3	0.004
ATL3	0.019
C11orf95	0.043
C11orf84	0.027
DNAJC4	0.011
VEGFB	0.032
PPP1R14B	0.035
TRMT112	0.013
PYGM	0.024
PPP2R5B	0.008
ARL2	0.035
CDCA5	0.025
VPS51	0.022
TM7SF2	0.015
ZNHIT2	0.019
FAU	0.003
TIGD3	0.025
NEAT1	0.045
MALAT1	0.038
SSSCA1	0.047
MIR4489	0.027
CTSW	0.011
CCDC85B	0.038
SART1	0.024
YIF1A	0.039
MRPL11	0.032
CTSF	0.048
C11orf80	0.023
CARNS1	0.026
PTPRCAP	0.008
CABP4	0.01
GSTP1	0.021
NDUFV1	0.022
DOC2GP	0.023
CHKA	0.023
MTL5	0.008
MRPL21	0.032
TPCN2	0.026
MYEOV	0.027
SHANK2_AS1	0.008
SHANK2_AS3	0.007
FLJ42102	0.013
FAM86C1	0.017
LOC100133315	0.015
LOC100128494	0.041
LRTOMT	0.041
LINC01537	0.01
MRPL48	0.041
PPME1	0.022
LOC101928580	0.016
PGM2L1	0.018
POLD3	0.014
ARRB1	0.022
RPS3	0.013
SNORD15A	0.035
SNORD15B	0.012
SERPINH1	0.029
DGAT2	0.011
LOC100506127	0.035
LRRC32	0.01
ACER3	0.003
CAPN5	0.024
CLNS1A	0.008
RSF1	0.008
KCTD21	0.035
USP35	0.024
ANKRD42	0.034
TMEM126A	0.03
SYTL2	0.037
EED	0.02
ME3	0.014
FZD4	0.025
NOX4	0.008
SLC36A4	0.036
SCARNA9	0.012
SNORD6	0.027
SNORA8	0.015
SNORA18	0.03
MIR1304	0.048
SNORA40	0.036
GPR83	0.024
FUT4	0.006
SRSF8	0.024
SESN3	0.008
CEP57	0.015
MTMR2	0.018
BIRC3	0.01
MMP8	0.015
CASP1P2	0.041
GRIA4	0.016
KBTBD3	0.021
LOC101928535	0.031
CWF19L2	0.008
ALKBH8	0.042
ELMOD1	0.011
CUL5	0.016
NPAT	0.005
ATM	0.025
EXPH5	0.039
COLCA1	0.009
C11orf1	0.008
LOC283140	0.003
NCAM1	0.032
TTC12	0.045
TMPRSS5	0.037
LOC101928940	0.006
LINC00900	0.032
BUD13	0.011
PAFAH1B2	0.036
CEP164	0.032
SCN2B	0.026
MPZL3	0.006
CD3E	0.02
CD3D	0.008
CD3G	0.013
ATP5L	0.042
RPS25	0.003
SLC37A4	0.048
HMBS	0.013
H2AFX	0.013
CBL	0.048
MCAM	0.016
USP2	0.026
TMEM136	0.009
ARHGEF12	0.047
TBCEL	0.014
SORL1	0.008
HSPA8	0.012
SNORD14D	0.014
SNORD14C	0.011
TBRG1	0.039
NRGN	0.035
VSIG2	0.016
LOC101929340	0.025
HEPACAM	0.007
LOC403312	0.024
CHEK1	0.037
PATE4	0.013
CDON	0.025
TIRAP	0.046
ST3GAL4_AS1	0.009
ST3GAL4	0.013
KIRREL3	0.004
ETS1	0.049
SENCR	0.01
TP53AIP1	0.012
ARHGAP32	0.031
TMEM45B	0.025
NFRKB	0.02
PRDM10	0.004
APLP2	0.043
C11orf44	0.041
LOC100507431	0.013
IGSF9B	0.032
JAM3	0.02
ACAD8	0.036
LOC100288778	0.045
LOC100049716	0.028
RAD52	0.02
LINC00942	0.008
CACNA1C	0.025
CACNA1C_AS1	0.041
ITFG2	0.013
CCND2	0.023
TIGAR	0.044
FGF23	0.029
NDUFA9	0.036
LOC101929549	0.019
KCNA6	0.014
ANO2	0.021
VWF	0.043
LTBR	0.017
TAPBPL	0.038
SCARNA10	0.011
ZNF384	0.023
LAG3	0.044
CD4	0.015
USP5	0.039
TPI1	0.033
RPL13P5	0.036
DSTNP2	0.015
ENO2	0.01
C12orf57	0.003
PHB2	0.03
SCARNA12	0.012
EMG1	0.043
LPCAT3	0.017
C1R	0.026
C1RL	0.006
C1RL_AS1	0.008
RBP5	0.024
CD163	0.014
SLC2A3	0.018
POU5F1P3	0.029
LINC00937	0.016
CLEC4D	0.008
AICDA	0.008
MFAP5	0.01
KLRG1	0.025
KLRB1	0.008
LOC374443	0.038
CLEC2D	0.008
CLECL1	0.028
KLRF1	0.013
CLEC2B	0.026
TMEM52B	0.006
GABARAPL1	0.031
KLRD1	0.028
KLRC4_KLRK1	0.014
KLRK1	0.015
KLRC1	0.049
LINC01252	0.024
LRP6	0.03
MANSC1	0.003
KIAA1467	0.029
GSG1	0.02
PLBD1	0.008
PLBD1_AS1	0.004
GUCY2C	0.004
HIST4H4	0.013
SKP1P2	0.02
AEBP2	0.045
IAPP	0.043
PYROXD1	0.021
LDHB	0.006
ABCC9	0.049
LMNTD1	0.028
RASSF8	0.022
MED21	0.02
ARNTL2	0.023
PPFIBP1	0.014
CCDC91	0.005
LOC100506606	0.027
LINC00941	0.024
METTL20	0.011
H3F3C	0.044
KIF21A	0.02
ABCD2	0.007
PPHLN1	0.028
PUS7L	0.037
IRAK4	0.02
SLC38A1	0.006
PCED1B	0.026
MIR4698	0.044
RPAP3	0.035
ENDOU	0.022
VDR	0.038
TMEM106C	0.035
ASB8	0.026
SNORA34	0.031
SNORA2B	0.026
CCDC65	0.01
WNT1	0.014
DNAJC22	0.005
LOC100335030	0.031
BCDIN3D_AS1	0.007
AQP6	0.006
COX14	0.021
LIMA1	0.033
LARP4	0.017
DIP2B	0.008
CSRNP2	0.007
FIGNL2	0.024
ACVR1B	0.004
KRT8	0.02
CSAD	0.014
ITGB7	0.004
RARG	0.044
PFDN5	0.013
SP7	0.017
TARBP2	0.042
NPFF	0.04
ATF7	0.029
NFE2	0.009
GPR84	0.019
PDE1B	0.025
PPP1R1A	0.032
TESPA1	0.03
ITGA7	0.008
RDH5	0.044
CDK2	0.006
SUOX	0.043
ERBB3	0.03
RPL41	0.003
ESYT1	0.005
COQ10A	0.022
IL23A	0.033
GLS2	0.048
PTGES3	0.007
NACA	0.02
PRIM1	0.012
SHMT2	0.021
MBD6	0.038
PIP4K2C	0.028
LOC101927583	0.015
CDK4	0.006
DPY19L2	0.027
SRGAP1	0.013
GNS	0.012
MSRB3	0.003
HMGA2	0.039
LOC100129940	0.013
LLPH_AS1	0.011
IRAK3	0.005
CAND1	0.033
LOC100507175	0.022
IFNG_AS1	0.034
IFNG	0.005
LOC100507195	0.017
RAP1B	0.011
SLC35E3	0.027
CPM	0.03
CPSF6	0.034
CCT2	0.006
RAB21	0.011
MRS2P2	0.013
CAPS2	0.04
GLIPR1L2	0.007
GLIPR1	0.044
KRR1	0.014
NAP1L1	0.004
CSRP2	0.015
LINC01490	0.014
LIN7A	0.009
MIR617	0.013
MIR618	0.006
METTL25	0.006
C12orf29	0.018
CEP290	0.009
KITLG	0.007
DUSP6	0.013
GALNT4	0.007
BTG1	0.03
EEA1	0.046
NUDT4	0.009
MRPL42	0.03
CRADD	0.045
LOC101928731	0.031
PLXNC1	0.009
TMCC3	0.04
VEZT	0.031
USP44	0.01
LOC643711	0.018
SLC9A7P1	0.027
LOC643770	0.026
SNORA53	0.011
APAF1	0.01
ACTR6	0.024
GAS2L3	0.007
UTP20	0.048
DRAM1	0.012
NUP37	0.045
IGF1	0.03
LINC00485	0.02
NT5DC3	0.013
NFYB	0.038
EID3	0.009
C12orf45	0.047
KCCAT198	0.016
C12orf75	0.009
CKAP4	0.005
RIC8B	0.021
BTBD11	0.018
LOC101929162	0.018
TMEM119	0.005
SELPLG	0.032
CORO1C	0.012
SSH1	0.024
MIR619	0.01
SVOP	0.007
GLTP	0.007
TCHP	0.007
FAM216A	0.045
TCTN1	0.02
HVCN1	0.038
PPP1CC	0.046
ATXN2	0.024
ALDH2	0.006
TMEM116	0.008
RPL6	0.008
PTPN11	0.048
OAS3	0.041
OAS2	0.01
SLC8B1	0.018
MIR620	0.005
TESC	0.046
NOS1	0.017
PEBP1	0.048
SUDS3	0.023
LINC00934	0.014
PRKAB1	0.027
RAB35	0.02
GCN1	0.03
RPLP0	0.011
RNU4_2	0.015
RNU4_1	0.021
MSI1	0.011
COX6A1	0.028
SRSF9	0.005
DYNLL1	0.013
RNF10	0.005
POP5	0.023
SPPL3	0.044
HNF1A_AS1	0.008
HNF1A	0.014
CAMKK2	0.013
RHOF	0.04
PSMD9	0.013
CLIP1_AS1	0.005
PITPNM2	0.015
MPHOSPH9	0.005
SETD8	0.002
RILPL2	0.034
SNRNP35	0.005
LOC101927415	0.032
DNAH10	0.029
FLJ37505	0.039
LINC00508	0.01
LINC00507	0.008
GLT1D1	0.009
FZD10_AS1	0.019
RAN	0.018
SFSWAP	0.009
SNORA49	0.01
ANKLE2	0.036
CHFR	0.019
PSPC1	0.017
GJB6	0.012
N6AMT2	0.011
XPO4	0.032
LATS2	0.006
ZDHHC20	0.025
SACS	0.013
LINC00327	0.024
MIPEP	0.011
SPATA13	0.021
TPTE2P1	0.032
AMER2	0.019
NUPL1	0.033
SHISA2	0.049
CDK8	0.03
USP12	0.044
SNORA27	0.043
RASL11A	0.041
POLR1D	0.024
RNU6_82P	0.005
FLT1	0.012
SLC46A3	0.026
HMGB1	0.036
USPL1	0.048
ALOX5AP	0.011
LINC00398	0.018
RXFP2	0.033
FRY_AS1	0.037
N4BP2L2	0.007
MINOS1P1	0.018
PDS5B	0.035
KL	0.006
CSNK1A1L	0.015
LINC00547	0.01
COG6	0.037
LINC00598	0.016
TPTE2P5	0.016
KBTBD6	0.035
LOC101929140	0.028
KBTBD7	0.013
VWA8_AS1	0.04
DGKH	0.033
AKAP11	0.011
EPSTI1	0.021
TSC22D1	0.016
LOC101929259	0.009
KCTD4	0.036
TPT1	0.012
TPT1_AS1	0.009
COG3	0.049
ESD	0.038
LPAR6	0.016
CDADC1	0.005
SETDB2	0.004
RCBTB1	0.026
ARL11	0.014
RNASEH2B	0.008
LINC00371	0.019
FAM124A	0.043
SERPINE3	0.022
INTS6	0.049
WDFY2	0.015
ATP7B	0.009
NEK5	0.015
HNRNPA1L2	0.043
LINC00458	0.035
LOC101926897	0.011
TDRD3	0.004
LINC00383	0.023
DACH1	0.005
BORA	0.02
PIBF1	0.011
KLF5	0.028
KLF12	0.011
LINC00381	0.044
COMMD6	0.004
LMO7	0.011
MYCBP2_AS1	0.02
SLAIN1	0.034
EDNRB	0.013
RNF219	0.042
RBM26	0.045
LINC00410	0.008
MIR17HG	0.012
LOC101927284	0.01
ABCC4	0.047
DZIP1	0.015
MBNL2	0.019
IPO5	0.012
SLC15A1	0.009
RNU6_83P	0.035
DOCK9_AS2	0.016
GPR183	0.007
FKSG29	0.037
LINC01039	0.008
CLYBL	0.025
PCCA	0.008
TPP2	0.024
METTL21C	0.013
BIVM	0.029
SLC10A2	0.009
MYO16_AS1	0.007
IRS2	0.022
RAB20	0.004
LINC00346	0.022
LINC00368	0.027
LINC01044	0.008
ATP11A_AS1	0.016
LAMP1	0.028
LOC101928841	0.006
DCUN1D2	0.008
TMCO3	0.007
TFDP1	0.003
RASA3	0.01
TTC5	0.041
CCNB1IP1	0.02
METTL17	0.029
NDRG2	0.008
LINC00641	0.02
HNRNPC	0.044
SNORD9	0.016
SNORD8	0.02
TOX4	0.03
METTL3	0.035
DAD1	0.011
PRMT5_AS1	0.007
LOC101926933	0.04
HAUS4	0.034
C14orf93	0.035
ACIN1	0.02
HOMEZ	0.037
BCL2L2	0.015
ZFHX2	0.041
JPH4	0.023
NRL	0.046
FITM1	0.033
PSME1	0.02
PSME2	0.008
CHMP4A	0.038
GMPR2	0.048
LTB4R	0.01
ADCY4	0.046
RIPK3	0.045
GZMH	0.019
GZMB	0.025
ARHGAP5	0.003
CFL2	0.006
BAZ1A	0.032
IGBP1P1	0.033
FAM177A1	0.009
LOC101927178	0.019
PTCSC3	0.005
FKBP3	0.014
MIS18BP1	0.022
RPS29	0.003
RPL36AL	0.048
DNAAF2	0.04
POLE2	0.021
KLHDC1	0.015
NEMF	0.021
VCPKMT	0.015
SOS2	0.024
L2HGDH	0.045
NIN	0.023
ABHD12B	0.01
PYGL	0.007
TRIM9	0.018
LOC102723604	0.008
C14orf166	0.022
PTGDR	0.013
TXNDC16	0.009
ERO1A	0.035
LOC101927620	0.007
WDHD1	0.018
FBXO34	0.017
PELI2	0.044
TMEM260	0.004
OTX2_AS1	0.01
C14orf105	0.017
PSMA3	0.028
TIMM9	0.014
CCDC175	0.015
MNAT1	0.009
FLJ22447	0.021
HIF1A	0.014
HIF1A_AS2	0.015
LINC00643	0.023
RHOJ	0.035
WDR89	0.023
MTHFD1	0.027
ZBTB1	0.023
HSPA2	0.005
LOC100506321	0.012
LOC100128233	0.018
FUT8	0.008
FUT8_AS1	0.012
EIF2S1	0.036
TMEM229B	0.005
PIGH	0.005
ACTN1	0.037
LOC100289511	0.018
PCNX	0.003
LOC145474	0.014
PAPLN	0.004
NUMB	0.034
ACOT4	0.018
DNAL1	0.019
ALDH6A1	0.024
ABCD4	0.048
VRTN	0.047
NPC2	0.035
AREL1	0.018
MLH3	0.018
ZC2HC1C	0.03
NEK9	0.045
JDP2	0.005
FLVCR2	0.03
ANGEL1	0.045
IRF2BPL	0.032
TMED8	0.004
SAMD15	0.025
NOXRED1	0.008
VIPAS39	0.019
SPTLC2	0.007
C14orf178	0.016
NRXN3	0.045
DIO2	0.01
CEP128	0.041
LOC101928767	0.006
LOC283585	0.016
GPR65	0.021
SPATA7	0.037
EFCAB11	0.023
KCNK13	0.019
NRDE2	0.008
CALM1	0.032
RPS6KA5	0.024
CATSPERB	0.008
TC2N	0.007
TRIP11	0.014
LGMN	0.049
BTBD7	0.043
DDX24	0.034
SERPINA11	0.047
CLMN	0.03
LINC00341	0.032
TUNAR	0.025
BCL11B	0.024
SETD3	0.031
HSP90AA1	0.029
MOK	0.033
ZNF839	0.006
CINP	0.008
TECPR2	0.038
RCOR1	0.014
MARK3	0.008
KLC1	0.007
PPP1R13B	0.011
LINC00637	0.017
TDRD9	0.006
ZBTB42	0.006
PLD4	0.02
CDCA4	0.015
GPR132	0.01
LOC102723354	0.048
TEX22	0.04
LOC100507437	0.031
CRIP2	0.025
CRIP1	0.045
TMEM121	0.024
LOC646214	0.031
HERC2P7	0.029
NIPA2	0.038
TUBGCP5	0.03
NPAP1	0.022
SNORD116_14	0.015
SNORD116_15	0.009
SNORD116_18	0.02
SNORD116_20	0.011
SNORD116_21	0.012
SNORD116_25	0.038
SNORD116_26	0.047
SNORD116_27	0.031
UBE3A	0.004
PDCD6IPP2	0.017
GOLGA8R	0.008
TRPM1	0.02
KLF13	0.039
CHRNA7	0.01
WHAMMP1	0.037
ARHGAP11A	0.008
FMN1	0.021
KATNBL1	0.041
SLC12A6	0.017
LOC101928174	0.011
C15orf41	0.015
FAM98B	0.016
RASGRP1	0.013
SRP14_AS1	0.03
PAK6	0.013
RPUSD2	0.008
RAD51	0.018
CHAC1	0.007
NDUFAF1	0.009
RTF1	0.019
TYRO3	0.012
MGA	0.013
CAPN3	0.007
ZNF106	0.007
LRRC57	0.009
LCMT2	0.027
ZSCAN29	0.044
CATSPER2P1	0.021
PIN4P1	0.024
CTDSPL2	0.008
LOC100419583	0.022
SHF	0.023
LOC101928414	0.015
SLC28A2	0.049
GATM	0.038
HMGN2P46	0.019
SQRDL	0.013
COPS2	0.003
GALK2	0.037
DTWD1	0.027
ATP8B4	0.037
FLJ10038	0.021
TRPM7	0.016
TNFAIP8L3	0.005
CYP19A1	0.015
GLDN	0.039
LYSMD2	0.043
TMOD3	0.023
LOC100422556	0.016
LOC100129973	0.022
MYO5C	0.018
ARPP19	0.038
RSL24D1	0.01
RAB27A	0.005
PIGBOS1	0.007
DYX1C1	0.036
PYGO1	0.014
NEDD4	0.021
RFX7	0.014
TEX9	0.019
ZNF280D	0.023
CGNL1	0.003
ALDH1A2	0.035
AQP9	0.01
HSP90AB4P	0.008
FAM63B	0.012
BNIP2	0.023
ICE2	0.005
RORA	0.01
VPS13C	0.011
C2CD4A	0.035
LACTB	0.042
RPS27L	0.017
APH1B	0.004
USP3_AS1	0.006
DAPK2	0.047
CSNK1G1	0.047
TRIP4	0.008
ANKDD1A	0.023
SPG21	0.018
MTFMT	0.035
RNU5A_1	0.021
RNU5B_1	0.02
HACD3	0.049
DENND4A	0.021
RAB11A	0.007
TIPIN	0.037
RPL4	0.013
SNORD16	0.028
ZWILCH	0.012
IQCH	0.045
C15orf61	0.042
MAP2K5	0.019
PIAS1	0.044
PAQR5	0.008
RPLP1	0.019
SALRNA3	0.027
LRRC49	0.028
THSD4_AS2	0.012
PARP6	0.014
HEXA	0.012
NPTN_IT1	0.01
C15orf59	0.023
STOML1	0.038
ISLR2	0.033
LOC729739	0.013
UBL7_AS1	0.047
CLK3	0.035
CYP1A2	0.04
COX5A	0.031
IMP3	0.006
UBE2Q2	0.009
TYRO3P	0.045
ISL2	0.041
PEAK1	0.023
LINC00597	0.007
PSMA4	0.025
TMED3	0.02
ST20	0.012
ZFAND6	0.022
LINC00927	0.009
LOC101929586	0.008
C15orf26	0.02
RPS17	0.005
CPEB1	0.008
ACTG1P17	0.013
SH3GL3	0.01
LOC440300	0.012
SEC11A	0.046
ALPK3	0.014
PDE8A	0.031
DET1	0.032
HAPLN3	0.013
RLBP1	0.022
LINC00925	0.034
IDH2	0.043
IQGAP1	0.034
LINC01585	0.042
MAN2A2	0.021
LOC101926911	0.007
CRAT37	0.005
SLCO3A1	0.015
LOC101927153	0.026
LINC01581	0.014
MCTP2	0.003
LINC00924	0.031
LINC00923	0.009
IRAIN	0.017
IGF1R	0.041
MIR4714	0.009
MEF2A	0.006
PRKXP1	0.019
ASB7	0.006
LRRK1	0.039
CHSY1	0.007
TARSL2	0.015
DDX11L9	0.037
DDX11L10	0.045
WASIR2	0.044
SNRNP25	0.048
LOC100134368	0.039
NHLRC4	0.027
C16orf13	0.033
JMJD8	0.033
METRN	0.048
CCDC78	0.03
SOX8	0.032
TMEM204	0.012
NME3	0.024
MRPS34	0.038
NUBP2	0.031
RPS2	0.005
SNORA10	0.044
SNORA64	0.02
GFER	0.018
SYNGR3	0.012
NTHL1	0.015
RAB26	0.012
SNHG19	0.009
SNORD60	0.006
MIR3178	0.047
LOC652276	0.015
SRRM2_AS1	0.006
PRSS30P	0.006
PKMYT1	0.023
LINC00514	0.012
LOC100128770	0.011
MMP25	0.042
MMP25_AS1	0.031
IL32	0.026
ZNF205_AS1	0.027
MEFV	0.018
DNASE1	0.017
LOC102724927	0.015
SRL	0.013
LINC01569	0.006
DNAJA3	0.032
SMIM22	0.035
C16orf89	0.006
PMM2	0.036
CARHSP1	0.025
C16orf72	0.003
ATF7IP2	0.009
EMP2	0.017
TVP23A	0.014
SOCS1	0.028
LITAF	0.014
RSL1D1	0.013
GSPT1	0.041
PARN	0.019
PKD1P6	0.035
RPS15A	0.003
TMC7	0.012
COQ7	0.009
KNOP1	0.046
GP2	0.02
ACSM3	0.028
ZP2	0.008
ANKS4B	0.007
NPIPB3	0.009
LOC100190986	0.042
METTL9	0.006
RRN3P1	0.005
POLR3E	0.042
SMG1P1	0.044
PALB2	0.036
CHP2	0.014
MIR1273H	0.008
LINC01567	0.01
FLJ21408	0.044
IL4R	0.005
XPO6	0.023
APOBR	0.032
IL27	0.045
LAT	0.031
SLC7A5P1	0.04
ZG16	0.03
KIF22	0.01
TMEM219	0.03
GDPD3	0.031
LOC613037	0.015
2022-09-01	0.008
ZNF48	0.022
MIR4518	0.048
ZNF785	0.024
ZNF689	0.037
PRR14	0.044
BCL7C	0.033
STX4	0.008
VKORC1	0.046
ITGAM	0.011
C16orf58	0.044
ZNF720	0.046
ENPP7P13	0.019
ORC6	0.006
MYLK3	0.017
PHKB	0.028
LOC101927132	0.005
N4BP1	0.014
CNEP1R1	0.045
CHD9	0.017
LOC643802	0.03
CAPNS2	0.007
LOC283856	0.015
GNAO1	0.011
MT2A	0.022
MT1E	0.036
MT1X	0.035
CPNE2	0.026
CCL22	0.017
DOK4	0.01
CCDC102A	0.026
ADGRG5	0.037
ADGRG3	0.014
CNGB1	0.026
USB1	0.017
CCDC113	0.019
SNORA76A	0.041
CMTM4	0.008
DYNC1LI2	0.005
NAE1	0.016
PDP2	0.044
CES3	0.016
NOL3	0.006
KIAA0895L	0.017
PLEKHG4	0.012
GFOD2	0.004
THAP11	0.028
NUTF2	0.022
PSMB10	0.011
NFATC3	0.008
PRMT7	0.006
CIRH1A	0.024
SNTB2	0.005
TERF2	0.027
NOB1	0.033
PDXDC2P	0.007
SMG1P7	0.023
LOC100506083	0.009
SF3B3	0.038
IL34	0.029
TAT	0.008
MARVELD3	0.027
PHLPP2	0.014
DHODH	0.023
DHX38	0.022
MLKL	0.011
TMEM170A	0.048
CHST6	0.015
ADAMTS18	0.024
WWOX	0.049
CMC2	0.015
CENPN	0.034
LOC101928446	0.013
ATP2C2	0.01
LOC400548	0.029
LINC00311	0.018
COX4I1	0.02
MTHFSD	0.018
FLJ30679	0.03
FBXO31	0.035
ZCCHC14	0.034
BANP	0.047
LOC400553	0.044
LOC100289580	0.015
APRT	0.025
GALNS	0.035
TRAPPC2L	0.028
LOC101927817	0.009
RPL13	0.005
SNORD68	0.01
VPS9D1	0.004
VPS9D1_AS1	0.005
SPIRE2	0.044
CENPBD1	0.043
PRDM7	0.009
FAM157C	0.011
DBIL5P	0.021
RNMTL1	0.021
CRK	0.007
TLCD2	0.022
MIR22HG	0.036
RPA1	0.004
DPH1	0.029
SMG6	0.039
TRPV1	0.022
CTNS	0.038
P2RX5_TAX1BP3	0.012
GSG2	0.018
C17orf85	0.009
CAMKK1	0.049
P2RX1	0.02
SPNS3	0.049
GGT6	0.02
ARRB2	0.007
CXCL16	0.025
ZFP3	0.048
NUP88	0.005
LOC339166	0.037
AIPL1	0.039
MED31	0.034
CLEC10A	0.048
SLC2A4	0.018
GPS2	0.03
CHRNB1	0.011
SNORA48	0.013
SNORD10	0.014
ATP1B2	0.016
TP53	0.027
DNAH2	0.035
TMEM88	0.044
CYB5D1	0.015
SCARNA21	0.008
LOC284023	0.015
KCNAB3	0.024
TMEM107	0.011
MIR4521	0.01
LINC00324	0.022
LOC100128288	0.006
RPL26	0.004
NDEL1	0.004
MYH10	0.005
LOC101928266	0.026
GLP2R	0.024
RCVRN	0.012
GAS7	0.009
ZNF18	0.031
LINC00670	0.02
LOC100128006	0.017
COX10_AS1	0.013
HS3ST3B1	0.02
MGC12916	0.018
TVP23C	0.021
LOC101928567	0.01
ADORA2B	0.027
LRRC75A_AS1	0.019
ZNF287	0.013
MED9	0.03
USP32P2	0.039
FAM106A	0.017
FOXO3B	0.008
TRIM16L	0.02
PRPSAP2	0.039
SLC5A10	0.024
GRAP	0.017
SNORD3C	0.034
SLC47A1	0.02
CCDC144NL_AS1	0.006
DHRS7B	0.013
WSB1	0.007
KRT18P55	0.002
SPAG5	0.049
SGK494	0.022
PROCA1	0.038
RPL23A	0.003
SNORD42B	0.048
TRAF4	0.016
DHRS13	0.042
LOC101927018	0.011
SEZ6	0.035
PIPOX	0.012
TP53I13	0.048
NSRP1	0.024
[truncated: 3,095 more rows]
